# Supplementary material
Source: PubMed Central journal article supplement (PMC2430342)
Supplement: 0712150105_Supplemental_PDF.pdf [file 0712150105_Supplemental_PDF.pdf]

# Supporting Information

Moffat *et al.* 10.1073/pnas.0712150105

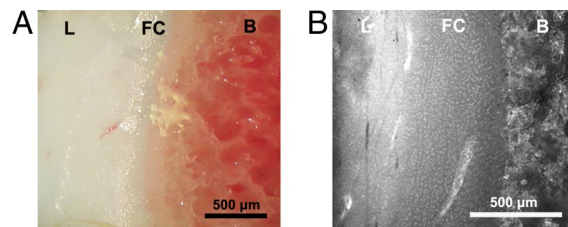

**Fig. S1.** Insertion site sample. (A) Stereomicrograph of the as-isolated sample with distinct yet continuous regions of ligament (L), fibrocartilage (FC), and bone (B). (B) Sample stained with Hoechst 33258 (4x), note the distinct cell nuclei observed at the fibrocartilage (FC) region.

**Table S1. Summary of  $R^2$  values from the linear regression analysis of the displacement data for strain determination**

| Insertion site | Applied nominal strain |             |             |             |
|----------------|------------------------|-------------|-------------|-------------|
|                | 5%                     | 10%         | 15%         | 20%         |
| <b>Femoral</b> |                        |             |             |             |
| NFC            | 0.76 ± 0.14            | 0.88 ± 0.12 | 0.90 ± 0.11 | 0.95 ± 0.08 |
| MFC            | 0.66 ± 0.18            | 0.82 ± 0.21 | 0.79 ± 0.32 | 0.96 ± 0.03 |
| FC             | 0.70 ± 0.15            | 0.83 ± 0.12 | 0.84 ± 0.18 | 0.95 ± 0.06 |
| <b>Tibial</b>  |                        |             |             |             |
| NFC            | 0.85 ± 0.16            | 0.92 ± 0.10 | 0.97 ± 0.02 | 0.99 ± 0.00 |
| MFC            | 0.64 ± 0.59            | 0.99 ± 0.06 | 0.89 ± 0.06 | 0.94 ± 0.04 |
| FC             | 0.71 ± 0.16            | 0.82 ± 0.11 | 0.90 ± 0.11 | 0.98 ± 0.02 |
